# Supplementary material for: Multiplexed monitoring of a novel autoantibody diagnostic signature of colorectal cancer using HaloTag technology-based electrochemical immunosensing platform
Source: PubMed Central journal article supplement (PMC7053203; doi:10.7150/thno.42507), 2020-02-10
Supplement: thnov10p3022s1.pdf [file thnov10p3022s1.pdf]

# Multiplexed monitoring of a novel autoantibody diagnostic signature of colorectal cancer using HaloTag technology-based electrochemical immunosensing platform

María Garranzo-Asensio<sup>1,2</sup>, Ana Guzmán-Aránguez<sup>1</sup>, Eloy Povedano<sup>3</sup>, Víctor Ruiz-Valdepeñas Montiel<sup>3</sup>, Carmen Poves<sup>4</sup>, María Jesús Fernández-Aceñero<sup>5</sup>, Ana Montero-Calle<sup>2</sup>, Guillermo Solís-Fernández<sup>2</sup>, Servando Fernández-Diez<sup>4</sup>, Jordi Camps<sup>6</sup>, Meritxell Arenas<sup>6</sup>, Elisabeth Rodríguez-Tomás<sup>6,7</sup>, Jorge Joven<sup>6</sup>, Maricruz Sanchez-Martinez<sup>2</sup>, Nuria Rodríguez<sup>8</sup>, Gemma Dominguez<sup>9</sup>, Paloma Yáñez-Sedeño<sup>3</sup>, José Manuel Pingarrón<sup>3,\*</sup>, Susana Campuzano<sup>3,\*</sup>, Rodrigo Barderas<sup>2,\*</sup>.

\* Co-senior authors and co-corresponding authors.

1. Departamento de Bioquímica y Biología Molecular, Facultad de Ciencias Químicas, Universidad Complutense de Madrid, 28040 Madrid, Spain.
2. UFIEC, Chronic Disease Programme, Instituto de Salud Carlos III, Majadahonda 28222, Madrid, Spain.
3. Departamento de Química Analítica, Facultad de Ciencias Químicas, Universidad Complutense de Madrid, 28040 Madrid, Spain
4. Gastroenterology Unit, Hospital Universitario Clínico San Carlos, E-28040, Madrid, Spain
5. Pathology Department, University Hospital Gregorio Marañón, E-28007 Madrid, Spain
6. Unitat de Recerca Biomèdica, Hospital Universitari Sant Joan, Institut d'Investigació Sanitària Pere Virgili, Universitat Rovira i Virgili, Reus (Spain).
7. Department of Radiation Oncology, Hospital Universitari Sant Joan, Institut d'Investigació Sanitària Pere Virgili, Universitat Rovira i Virgili, Reus (Spain).
8. Medical Oncology Department, Hospital Universitario La Paz, E-28046, Madrid, Spain.
9. Departamento de Medicina, Facultad de Medicina, Instituto de Investigaciones Biomédicas "Alberto Sols", CSIC-UAM, E-28029, Madrid, Spain.

\*To whom correspondence should be addressed:

Rodrigo Barderas.

Functional Proteomics Unit, UFIEC, Chronic Disease Programme, Instituto de Salud Carlos III, E-28222 Majadahonda, Madrid, Spain; Tel.: 34-91-8223231; E-mail: [r.barderasm@isciii.es](mailto:r.barderasm@isciii.es)

Susana Campuzano

Departamento de Química Analítica, Facultad de Ciencias Químicas, Universidad Complutense de Madrid, 28040 Madrid, Spain; Tel.: 34-91-3944219; E-mail: [susanacr@ucm.es](mailto:susanacr@ucm.es)

José M. Pingarrón

Departamento de Química Analítica, Facultad de Ciencias Químicas, Universidad Complutense de Madrid, 28040 Madrid, Spain; Tel.: 34-91-3944315; E-mail: [pingarro@quim.ucm.es](mailto:pingarro@quim.ucm.es)

## Supplementary Tables and figures

**Table S1. Individual clinical information of the colorectal cancer patients and controls used in the study.**

| Plasma code | Classification       | Group                | Gender | Age | Cancer stage |
|-------------|----------------------|----------------------|--------|-----|--------------|
| CT1         | Negative colonoscopy | Asymptomatic/Control | F      | 43  | -            |
| CT2         | Negative colonoscopy | Asymptomatic/Control | M      | 35  | -            |
| CT3         | Negative colonoscopy | Asymptomatic/Control | F      | 48  | -            |
| CT4         | Negative colonoscopy | Asymptomatic/Control | M      | 41  | -            |
| CT5         | Negative colonoscopy | Asymptomatic/Control | M      | 36  | -            |
| CT6         | Negative colonoscopy | Asymptomatic/Control | F      | 46  | -            |
| CT7         | Negative colonoscopy | Asymptomatic/Control | F      | 40  | -            |
| CT8         | Negative colonoscopy | Asymptomatic/Control | F      | 41  | -            |
| CT9         | Asymptomatic         | Asymptomatic/Control | M      | 41  | -            |
| CT10        | Asymptomatic         | Asymptomatic/Control | F      | 55  | -            |
| CT11        | Asymptomatic         | Asymptomatic/Control | M      | 49  | -            |
| CT12        | Asymptomatic         | Asymptomatic/Control | F      | 44  | -            |
| CT13        | Asymptomatic         | Asymptomatic/Control | F      | 52  | -            |
| CT14        | Asymptomatic         | Asymptomatic/Control | M      | 31  | -            |
| CT15        | Asymptomatic         | Asymptomatic/Control | F      | 38  | -            |
| CT16        | Asymptomatic         | Asymptomatic/Control | F      | 41  | -            |
| CT17        | Asymptomatic         | Asymptomatic/Control | F      | 46  | -            |
| CT18        | Asymptomatic         | Asymptomatic/Control | F      | 37  | -            |
| CT19        | Negative colonoscopy | Asymptomatic/Control | M      | 57  | -            |
| CT20        | Negative colonoscopy | Asymptomatic/Control | M      | 58  | -            |
| CT21        | Asymptomatic         | Asymptomatic/Control | F      | 38  | -            |
| CT22        | Asymptomatic         | Asymptomatic/Control | F      | 51  | -            |
| CT23        | Asymptomatic         | Asymptomatic/Control | F      | 29  | -            |
| CT24        | Asymptomatic         | Asymptomatic/Control | F      | 50  | -            |
| CT25        | Asymptomatic         | Asymptomatic/Control | M      | 39  | -            |
| CT26        | Asymptomatic         | Asymptomatic/Control | F      | 45  | -            |
| CT27        | Asymptomatic         | Asymptomatic/Control | F      | 47  | -            |
| CT28        | Asymptomatic         | Asymptomatic/Control | F      | 51  | -            |
| CT29        | Asymptomatic         | Asymptomatic/Control | M      | 34  | -            |
| CT30        | Asymptomatic         | Asymptomatic/Control | M      | 40  | -            |
| B1          | Breast cancer        | Control              | F      | 61  | III          |
| B2          | Breast cancer        | Control              | F      | 50  | II           |
| B3          | Breast cancer        | Control              | F      | 55  | I            |
| B4          | Breast cancer        | Control              | F      | 57  | II           |
| B5          | Breast cancer        | Control              | F      | 72  | II           |
| B6          | Breast cancer        | Control              | F      | 60  | I            |
| B7          | Breast cancer        | Control              | F      | 50  | II           |
| B8          | Breast cancer        | Control              | F      | 68  | I            |

|       |               |                                 |   |    |     |
|-------|---------------|---------------------------------|---|----|-----|
| B9    | Breast cancer | Control                         | F | 34 | II  |
| B10   | Breast cancer | Control                         | F | 46 | III |
| B11   | Breast cancer | Control                         | F | 69 | II  |
| B12   | Breast cancer | Control                         | F | 79 | III |
| B13   | Breast cancer | Control                         | F | 55 | I   |
| B14   | Breast cancer | Control                         | F | 41 | I   |
| B15   | Breast cancer | Control                         | F | 83 | II  |
| B16   | Breast cancer | Control                         | F | 65 | I   |
| B17   | Breast cancer | Control                         | F | 65 | II  |
| B18   | Breast cancer | Control                         | F | 47 | I   |
| B19   | Breast cancer | Control                         | F | 54 | III |
| B20   | Breast cancer | Control                         | F | 55 | III |
| L1    | Lung cancer   | Control                         | M | 84 | I   |
| L2    | Lung cancer   | Control                         | M | 72 | II  |
| L3    | Lung cancer   | Control                         | M | 55 | III |
| L4    | Lung cancer   | Control                         | M | 55 | III |
| L5    | Lung cancer   | Control                         | M | 59 | III |
| L6    | Lung cancer   | Control                         | M | 85 | I   |
| L7    | Lung cancer   | Control                         | M | 68 | II  |
| L8    | Lung cancer   | Control                         | F | 63 | III |
| L9    | Lung cancer   | Control                         | M | 67 | III |
| L10   | Lung cancer   | Control                         | M | 71 | III |
| L11   | Lung cancer   | Control                         | M | 75 | I   |
| L12   | Lung cancer   | Control                         | F | 53 | III |
| L13   | Lung cancer   | Control                         | M | 84 | I   |
| L14   | Lung cancer   | Control                         | M | 82 | I   |
| L15   | Lung cancer   | Control                         | M | 65 | II  |
| L16   | Lung cancer   | Control                         | M | 64 | III |
| L17   | Lung cancer   | Control                         | F | 57 | II  |
| L18   | Lung cancer   | Control                         | M | 79 | I   |
| L19   | Lung cancer   | Control                         | F | 59 | II  |
| L20   | Lung cancer   | Control                         | M | 71 | III |
| PRE1  | Adenoma       | Premalignant group/pathological | M | 59 | -   |
| PRE2  | Adenoma       | Premalignant group/pathological | F | 64 | -   |
| PRE3  | Adenoma       | Premalignant group/pathological | M | 65 | -   |
| PRE4  | Adenoma       | Premalignant group/pathological | M | 60 | -   |
| PRE5  | Adenoma       | Premalignant group/pathological | M | 59 | -   |
| PRE6  | Adenoma       | Premalignant group/pathological | M | 57 | -   |
| PRE7  | Adenoma       | Premalignant group/pathological | M | 70 | -   |
| PRE8  | Adenoma       | Premalignant group/pathological | M | 40 | -   |
| PRE9  | Adenoma       | Premalignant group/pathological | F | 57 | -   |
| PRE10 | Adenoma       | Premalignant group/pathological | M | 60 | -   |
| PRE11 | Adenoma       | Premalignant group/pathological | F | 50 | -   |
| PRE12 | Adenoma       | Premalignant group/pathological | M | 67 | -   |
| PRE13 | Adenoma       | Premalignant group/pathological | F | 61 | -   |
| PRE14 | Adenoma       | Premalignant group/pathological | F | 62 | -   |

|       |         |                                 |   |    |      |
|-------|---------|---------------------------------|---|----|------|
| PRE15 | Adenoma | Premalignant group/pathological | M | 59 | -    |
| PRE16 | Adenoma | Premalignant group/pathological | F | 54 | -    |
| PRE17 | Adenoma | Premalignant group/pathological | M | 60 | -    |
| PRE18 | Adenoma | Premalignant group/pathological | M | 69 | -    |
| PRE19 | Adenoma | Premalignant group/pathological | M | 60 | -    |
| PRE20 | Adenoma | Premalignant group/pathological | M | 62 | -    |
| PRE21 | Adenoma | Premalignant group/pathological | F | 60 | -    |
| PRE22 | Adenoma | Premalignant group/pathological | F | 75 | -    |
| PRE23 | Adenoma | Premalignant group/pathological | M | 61 | -    |
| PRE24 | Adenoma | Premalignant group/pathological | F | 59 | -    |
| PRE25 | Adenoma | Premalignant group/pathological | M | 57 | -    |
| CRC1  | CRC     | CRC group/pathological          | F | 85 | IIIC |
| CRC2  | CRC     | CRC group/pathological          | F | 74 | IV   |
| CRC3  | CRC     | CRC group/pathological          | M | 63 | IIIA |
| CRC4  | CRC     | CRC group/pathological          | F | 60 | IIIA |
| CRC5  | CRC     | CRC group/pathological          | M | 75 | IIIC |
| CRC6  | CRC     | CRC group/pathological          | F | 74 | IV   |
| CRC7  | CRC     | CRC group/pathological          | M | 82 | IV   |
| CRC8  | CRC     | CRC group/pathological          | M | 85 | III  |
| CRC9  | CRC     | CRC group/pathological          | F | 58 | IV   |
| CRC10 | CRC     | CRC group/pathological          | M | 54 | IV   |
| CRC11 | CRC     | CRC group/pathological          | F | 87 | IV   |
| CRC12 | CRC     | CRC group/pathological          | M | 84 | IV   |
| CRC13 | CRC     | CRC group/pathological          | F | 58 | IV   |
| CRC14 | CRC     | CRC group/pathological          | F | 51 | IV   |
| CRC15 | CRC     | CRC group/pathological          | M | 84 | IV   |
| CRC16 | CRC     | CRC group/pathological          | M | 62 | III  |
| CRC17 | CRC     | CRC group/pathological          | M | 71 | IIIA |
| CRC18 | CRC     | CRC group/pathological          | M | 72 | IV   |
| CRC19 | CRC     | CRC group/pathological          | F | 55 | IV   |
| CRC20 | CRC     | CRC group/pathological          | M | 78 | IIIA |
| CRC21 | CRC     | CRC group/pathological          | M | 61 | IIIB |
| CRC22 | CRC     | CRC group/pathological          | F | 66 | IIIA |
| CRC23 | CRC     | CRC group/pathological          | F | 59 | IV   |
| CRC24 | CRC     | CRC group/pathological          | M | 82 | IV   |
| CRC25 | CRC     | CRC group/pathological          | F | 66 | IV   |
| CRC26 | CRC     | CRC group/pathological          | F | 66 | IV   |

---

**Table S2. Analysis of the diagnostic value of indicated autoantibodies by means of ROC curves analyses.**

|                                                   | All controls vs Pathological |                 |                 | All controls vs CRC |                 |                 | All controls vs Premalignant |                 |                 |
|---------------------------------------------------|------------------------------|-----------------|-----------------|---------------------|-----------------|-----------------|------------------------------|-----------------|-----------------|
| Autoantibody target                               | AUC (%)                      | Sensitivity (%) | Specificity (%) | AUC (%)             | Sensitivity (%) | Specificity (%) | AUC (%)                      | Sensitivity (%) | Specificity (%) |
| GTF2B                                             | 60.6                         | 26.0            | 100.0           | 69.1                | 44.0            | 92.9            | 52.1                         | 16.0            | 100.0           |
| MAPKAPK3                                          | 72.5                         | 50.0            | 95.7            | 75.8                | 56.0            | 95.7            | 69.1                         | 44.0            | 95.7            |
| PIM1                                              | 81.3                         | 68.0            | 92.9            | 87.2                | 76.0            | 97.1            | 75.4                         | 56.0            | 94.3            |
| PKN1                                              | 77.1                         | 70.0            | 80.0            | 83.5                | 76.0            | 81.4            | 70.7                         | 64.0            | 80.0            |
| SRC                                               | 70.1                         | 64.0            | 82.9            | 75.9                | 72.0            | 84.3            | 64.3                         | 56.0            | 82.9            |
| STK4                                              | 75.9                         | 68.0            | 82.9            | 76.1                | 72.0            | 82.9            | 75.7                         | 68.0            | 80.0            |
| SULF1                                             | 72.2                         | 64.0            | 81.4            | 77.7                | 64.0            | 85.7            | 66.7                         | 60.0            | 81.4            |
| p53                                               | 57.4                         | 36.0            | 87.1            | 62.2                | 44.0            | 87.1            | 52.7                         | 36.0            | 80.0            |
| Combination of statistically significant proteins | 87.6                         | 72.0            | 92.9            | 91.8                | 76.0            | 98.6            | 83.0                         | 84.0            | 75.7            |
|                                                   | Asymptomatic vs Pathological |                 |                 | Asymptomatic vs CRC |                 |                 | Asymptomatic vs Premalignant |                 |                 |
| Autoantibody target                               | AUC (%)                      | Sensitivity (%) | Specificity (%) | AUC (%)             | Sensitivity (%) | Specificity (%) | AUC (%)                      | Sensitivity (%) | Specificity (%) |
| GTF2B                                             | 63.8                         | 26.0            | 100.0           | 71.4                | 56.0            | 83.3            | 70.3                         | 53.8            | 83.3            |
| MAPKAPK3                                          | 71.9                         | 58.0            | 90.0            | 75.4                | 64.0            | 90.0            | 76.0                         | 65.4            | 90.0            |
| PIM1                                              | 78.9                         | 62.0            | 93.3            | 85.1                | 76.0            | 93.3            | 85.5                         | 76.9            | 93.3            |
| PKN1                                              | 71.4                         | 62.0            | 76.7            | 77.6                | 68.0            | 76.7            | 77.6                         | 69.2            | 76.7            |
| SRC                                               | 62.1                         | 62.0            | 73.3            | 68.1                | 72.0            | 73.3            | 68.8                         | 73.1            | 73.3            |
| STK4                                              | 73.4                         | 68.0            | 80.0            | 73.8                | 72.0            | 80.0            | 74.3                         | 73.1            | 80.0            |
| SULF1                                             | 64.8                         | 72.0            | 53.3            | 69.3                | 88.0            | 46.7            | 70.4                         | 88.5            | 46.7            |
| p53                                               | 63.1                         | 36.0            | 90.0            | 67.3                | 69.0            | 76.6            | 68.2                         | 61.5            | 76.7            |
| Combination of statistically significant proteins | 85.3                         | 74.0            | 90.0            | 92.4                | 76.0            | 96.7            | 78.4                         | 72.0            | 80.0            |

**Table S3. Comparison of the AUC obtained in different studies.**

|                                                 | Here described methodology |                 |                 | Previous methodologies |                 |                 |
|-------------------------------------------------|----------------------------|-----------------|-----------------|------------------------|-----------------|-----------------|
| Asymptomatic healthy control individuals vs CRC |                            |                 |                 |                        |                 |                 |
| Autoantibody target                             | AUC (%)                    | Sensitivity (%) | Specificity (%) | AUC (%)                | Sensitivity (%) | Specificity (%) |
| GTF2B                                           | 71.4                       | 56.0            | 83.3            | 66.0*                  | 69.0*           | 60.0*           |
| GTF2B                                           | 71.4                       | 56.0            | 83.3            | 62.9^                  | 13.0^           | 90.0^           |
| MAPKAPK3                                        | 75.4                       | 64.0            | 90.0            | 64.4^                  | 8.0^            | 90.0^           |
| PIM1                                            | 85.1                       | 76.0            | 93.3            | 63.6                   | 13              | 90.0            |
| PKN1                                            | 77.6                       | 68.0            | 76.7            | -                      | -               | -               |
| SRC                                             | 68.1                       | 72.0            | 73.3            | -                      | -               | -               |
| STK4                                            | 73.8                       | 72.0            | 80.0            | 64.4^                  | 18.0^           | 90.0^           |
| SULF1                                           | 69.3                       | 88.0            | 46.7            | -                      | -               | -               |
| p53                                             | 67.3                       | 69.0            | 76.6            | 62.0*                  | 71.0*           | 40.0*           |
| p53                                             | 67.3                       | 69.0            | 76.6            | 68.8^                  | 13              | 90.0^           |

\* Data from Barderas, R.; Villar-Vazquez, R.; Fernandez-Acenero, M. J.; Babel, I.; Pelaez-Garcia, A.; Torres, S.; Casal, J. I. Sci Rep 2013, 3, 2938.

^ Data from Villar-Vazquez, R.; Padilla, G.; Fernandez-Acenero, M. J.; Suarez, A.; Fuente, E.; Pastor, C.; Calero, M.; Barderas, R.; Casal, J. I. Proteomics 2016, 16, 1280-1290.

**Table S4.** Primary and secondary antibodies used in the study.

| <b>Primary Antibodies</b>                                       |                  |               |                    |                 |                 |                  |
|-----------------------------------------------------------------|------------------|---------------|--------------------|-----------------|-----------------|------------------|
| <b>Antibody target</b>                                          | <b>Clonality</b> | <b>Source</b> | <b>Application</b> | <b>Dilution</b> | <b>Provider</b> | <b>Reference</b> |
| HaloTag                                                         | Monoclonal       | Mouse         | WB/ELISA           | 1:1000          | Promega         | G921A            |
| p53                                                             | Monoclonal       | Mouse         | ELISA              | 1:1000          | SCBT            | sc-126           |
| SRC                                                             | Polyclonal       | Goat          | ELISA              | 1:1000          | R&D Systems     | AF3389           |
| MAPKAPK3                                                        | Monoclonal       | Mouse         | ELISA              | 1:1000          | Abnova          | H00007867-M02    |
| <b>HRP-labeled secondary antibodies or HRP-labeled reagents</b> |                  |               |                    |                 |                 |                  |
| <b>Name</b>                                                     | <b>Clonality</b> | <b>Source</b> | <b>Application</b> | <b>Dilution</b> | <b>Provider</b> |                  |
| HRP anti-mouse IgG                                              | Polyclonal       | Goat          | WB/ELISA           | 1:2500          | Dako            |                  |
| HRP anti-rabbit IgG                                             | Polyclonal       | Goat          | WB                 | 1:3000          | BioRad          |                  |
| HRP anti-goat IgG                                               | Polyclonal       | Rabbit        | ELISA              | 1:1000          | Jackson         |                  |
| HRP anti-human IgG                                              | Polyclonal       | Goat          | ELISA              | 1:10000         | Jackson         |                  |

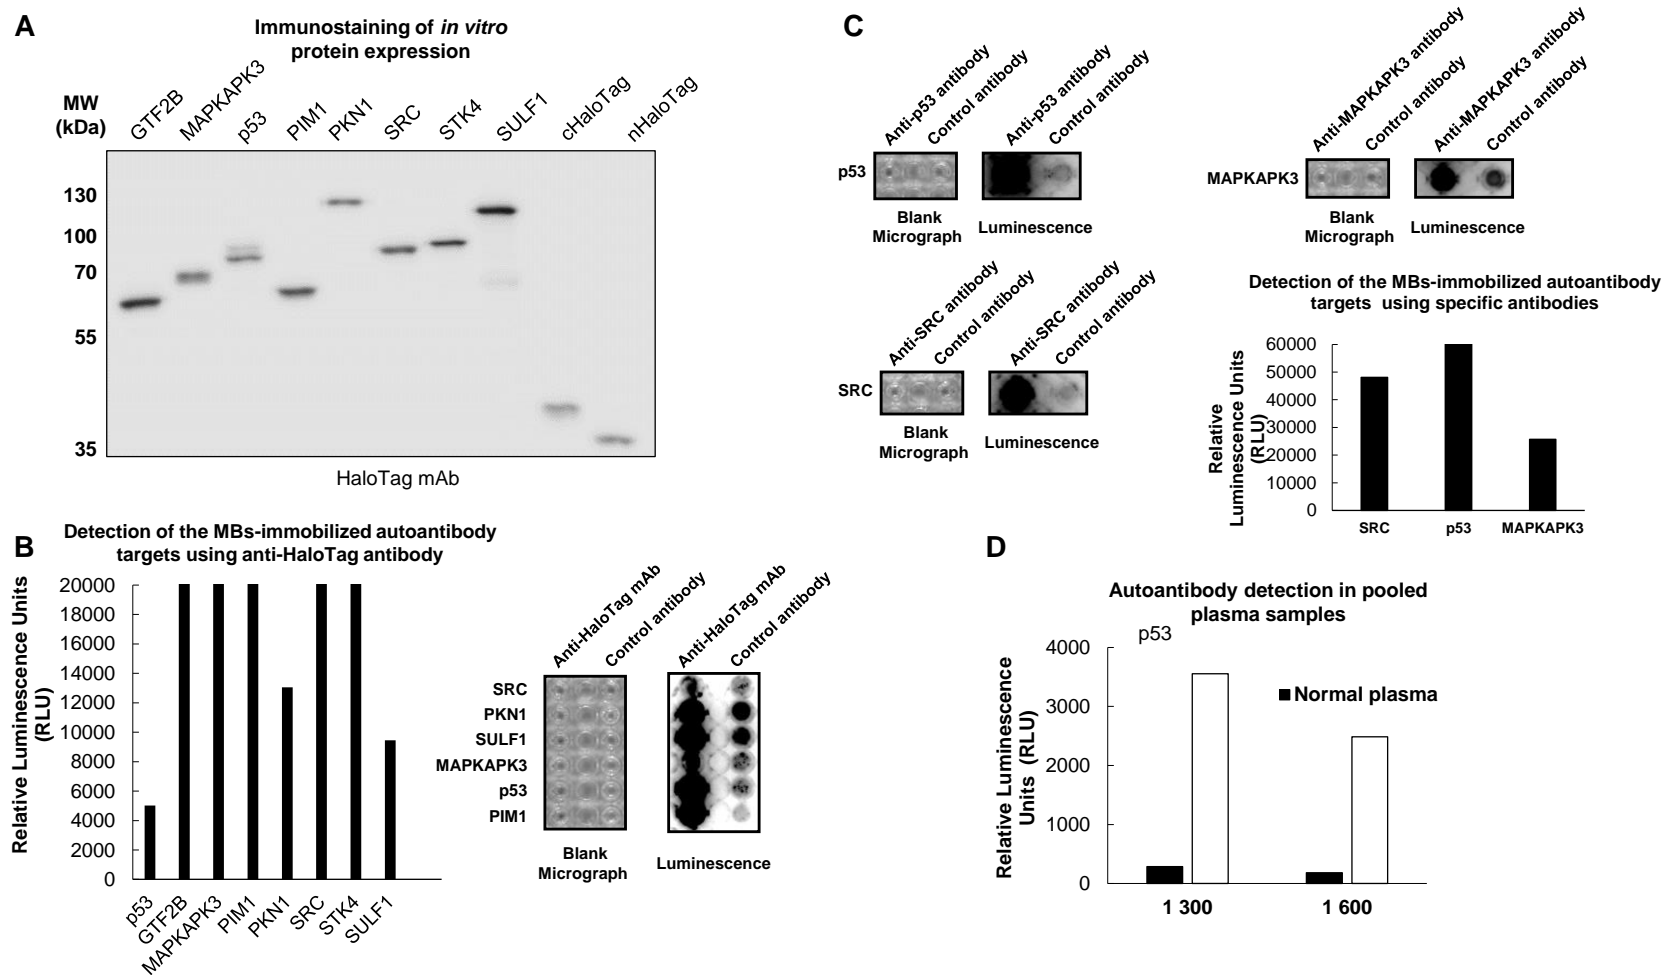

**Figure S1. Verification of the *in vitro* protein expression and immobilization onto magnetic beads of the HaloTagged fusion proteins.** (A) Autoantibody targets expression as HaloTag fusion proteins was verified by immunostaining using an antibody against the tag. The molecular mass of the proteins was in accordance to their theoretical mass with the HaloTag. (B) The correct immobilization of the proteins was verified by luminescence using an anti-HaloTag antibody. (C) The correct immobilization of the proteins was verified by luminescence using the indicated specific antibodies against the TAAs. (B, C) Quantitative luminescence was measured on The Spark multimode microplate reader (Tecan) and depicted by bar graph. Indicated MBs were placed on 96-well Maxisorp white plates and Luminescence was developed with ECL Western Blotting Substrate. Blank micrograph depicting the position of the indicated MBs, and luminescence recorded on an Amersham Imager 680 (GE Healthcare) are depicted. (D) Optimal assay conditions for the luminescence beads assay were found using pooled plasma samples at a 1:300 dilution.
